# Supplementary material for: Epidemiology of Myalgic Encephalomyelitis among individuals with self-reported Chronic Fatigue Syndrome in British Columbia, Canada, and their health-related quality of life
Source: bioRxiv or medRxiv preprint supplement (doi:10.1101/2024.05.16.24307437), 2024-05-16
Supplement: Supplementary file [file media-1.pdf]

## SUPPLEMENTARY FIGURE

*S1 Fig. Flowchart describing recruitment process.*

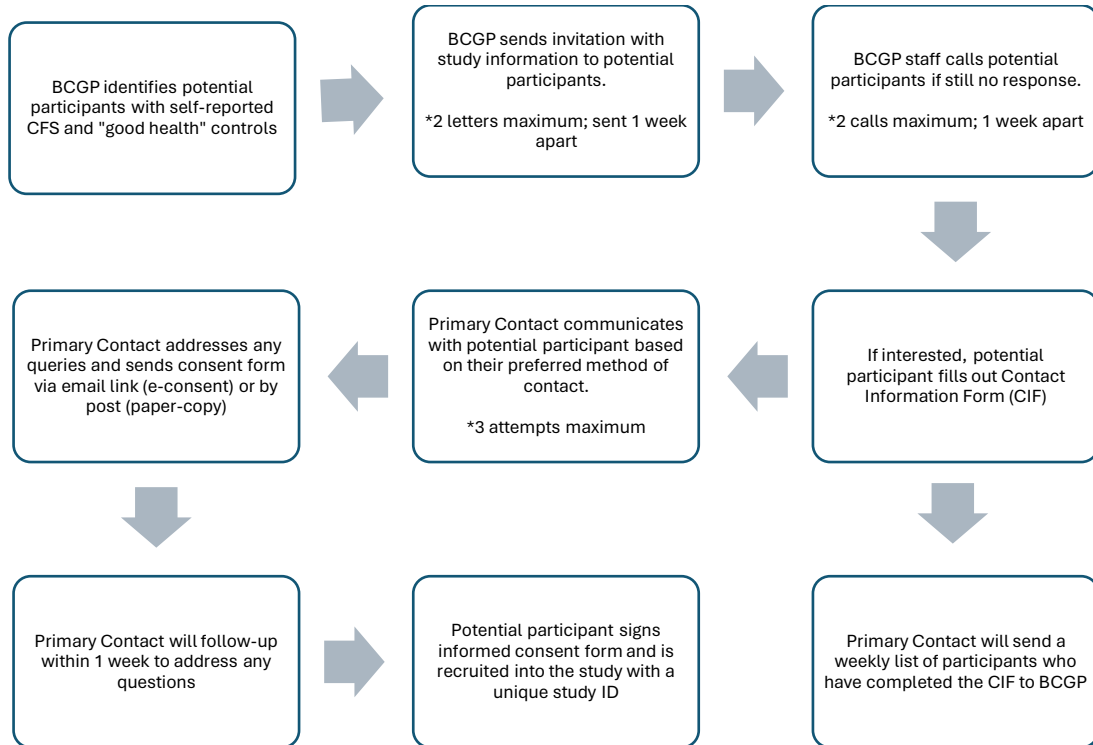

**Note:** BCGP means British Columbia Generation Project cohort.

Primary Contact means a research assistant from our Research Team, who primarily contacted to all the participants in the study
